# Supplementary material for: Community Dynamics in Structure and Function of Honey Bee Gut Bacteria in Response to Winter Dietary Shift
Source: PubMed Central journal article supplement (PMC9600256; doi:10.1128/mbio.01131-22), 2022-08-29
Supplement: mbio.01131-22-s0001.pdf [file mbio.01131-22-s0001.pdf]

| Sample | Species                | Colony   | Sample_time | Sapmle_Location | Latitude_longitude |            |          | Sequencing              |
|--------|------------------------|----------|-------------|-----------------|--------------------|------------|----------|-------------------------|
| B11524 | <i>A. m. carnica</i>   | jlsk3121 | Jun         | China: Jilin    | 25.55 N 99.58 E    | —          | —        | untargeted metabolitics |
| B11525 | <i>A. m. carnica</i>   | jlsk3121 | Jun         | China: Jilin    | 25.55 N 99.58 E    | —          | —        | untargeted metabolitics |
| B11526 | <i>A. m. carnica</i>   | jlsk3121 | Jun         | China: Jilin    | 25.55 N 99.58 E    | —          | —        | untargeted metabolitics |
| W2042  | <i>A. m. carnica</i>   | jlsk3121 | Jan         | China: Jilin    | 25.55 N 99.58 E    | —          | —        | untargeted metabolitics |
| W2044  | <i>A. m. carnica</i>   | jlsk3121 | Jan         | China: Jilin    | 25.55 N 99.58 E    | —          | —        | untargeted metabolitics |
| W2046  | <i>A. m. carnica</i>   | jlsk3121 | Jan         | China: Jilin    | 25.55 N 99.58 E    | —          | —        | untargeted metabolitics |
| W3394  | <i>A. m. carnica</i>   | jlsk3121 | Mar         | China: Jilin    | 25.55 N 99.58 E    | —          | —        | untargeted metabolitics |
| W3396  | <i>A. m. carnica</i>   | jlsk3121 | Mar         | China: Jilin    | 25.55 N 99.58 E    | —          | —        | untargeted metabolitics |
| W3398  | <i>A. m. carnica</i>   | jlsk3121 | Mar         | China: Jilin    | 25.55 N 99.58 E    | —          | —        | untargeted metabolitics |
| W6950  | <i>A. m. carnica</i>   | jlsk3121 | Nov         | China: Jilin    | 25.55 N 99.58 E    | —          | —        | untargeted metabolitics |
| W6952  | <i>A. m. carnica</i>   | jlsk3121 | Nov         | China: Jilin    | 25.55 N 99.58 E    | —          | —        | untargeted metabolitics |
| W6954  | <i>A. m. carnica</i>   | jlsk3121 | Nov         | China: Jilin    | 25.55 N 99.58 E    | —          | —        | untargeted metabolitics |
| B4043  | <i>A. m. carnica</i>   | jlsk3121 | November    | China: Jilin    | 25.55 N 99.58 E    | metagenome | —        |                         |
| B4044  | <i>A. m. carnica</i>   | jlsk3121 | November    | China: Jilin    | 25.55 N 99.58 E    | metagenome | 16S rRNA |                         |
| B4045  | <i>A. m. carnica</i>   | jlsk3121 | November    | China: Jilin    | 25.55 N 99.58 E    | metagenome | 16S rRNA |                         |
| B4046  | <i>A. m. ligustica</i> | jlyy2060 | November    | China: Jilin    | 25.55 N 99.58 E    | metagenome | 16S rRNA |                         |
| B4047  | <i>A. m. ligustica</i> | jlyy2060 | November    | China: Jilin    | 25.55 N 99.58 E    | metagenome | 16S rRNA |                         |

---

|       |                        |          |          |              |                 |            |          |
|-------|------------------------|----------|----------|--------------|-----------------|------------|----------|
| B4048 | <i>A. m. ligustica</i> | jlyy2060 | November | China: Jilin | 25.55 N 99.58 E | metagenome | 16S rRNA |
| B4049 | <i>A. m. mellifera</i> | jloh5140 | November | China: Jilin | 25.55 N 99.58 E | metagenome | 16S rRNA |
| B4050 | <i>A. m. mellifera</i> | jloh5140 | November | China: Jilin | 25.55 N 99.58 E | metagenome | 16S rRNA |
| B4051 | <i>A. m. mellifera</i> | jloh5140 | November | China: Jilin | 25.55 N 99.58 E | metagenome | 16S rRNA |
| B4052 | <i>A. m. carnica</i>   | sk12     | November | China: Jilin | 25.55 N 99.58 E | metagenome | 16S rRNA |
| B4053 | <i>A. m. carnica</i>   | sk12     | November | China: Jilin | 25.55 N 99.58 E | metagenome | 16S rRNA |
| B4054 | <i>A. m. carnica</i>   | sk12     | November | China: Jilin | 25.55 N 99.58 E | metagenome | 16S rRNA |
| B4055 | <i>A. m. carnica</i>   | sk11     | November | China: Jilin | 25.55 N 99.58 E | metagenome | 16S rRNA |
| B4056 | <i>A. m. carnica</i>   | sk11     | November | China: Jilin | 25.55 N 99.58 E | metagenome | 16S rRNA |
| B4057 | <i>A. m. carnica</i>   | sk11     | November | China: Jilin | 25.55 N 99.58 E | metagenome | 16S rRNA |
| B4058 | <i>A. m. ligustica</i> | jlyy2061 | November | China: Jilin | 25.55 N 99.58 E | metagenome | 16S rRNA |
| B4059 | <i>A. m. ligustica</i> | jlyy2061 | November | China: Jilin | 25.55 N 99.58 E | metagenome | 16S rRNA |
| B4060 | <i>A. m. ligustica</i> | jlyy2061 | November | China: Jilin | 25.55 N 99.58 E | metagenome | 16S rRNA |
| B4062 | <i>A. m. mellifera</i> | jloh5127 | November | China: Jilin | 25.55 N 99.58 E | metagenome | 16S rRNA |
| B4061 | <i>A. m. mellifera</i> | jloh5127 | November | China: Jilin | 25.55 N 99.58 E | metagenome | 16S rRNA |
| B4063 | <i>A. m. mellifera</i> | jloh5127 | November | China: Jilin | 25.55 N 99.58 E | metagenome | 16S rRNA |
| B4064 | <i>A. m. carnica</i>   | jlsk3028 | November | China: Jilin | 25.55 N 99.58 E | metagenome | 16S rRNA |
| B4065 | <i>A. m. carnica</i>   | jlsk3028 | November | China: Jilin | 25.55 N 99.58 E | metagenome | 16S rRNA |
| B4066 | <i>A. m. carnica</i>   | jlsk3028 | November | China: Jilin | 25.55 N 99.58 E | metagenome | 16S rRNA |

---

---

|       |                        |          |         |              |                 |            |          |
|-------|------------------------|----------|---------|--------------|-----------------|------------|----------|
| W1324 | <i>A. m. carnica</i>   | sk11     | January | China: Jilin | 25.55 N 99.58 E | metagenome | 16S rRNA |
| W1326 | <i>A. m. carnica</i>   | sk11     | January | China: Jilin | 25.55 N 99.58 E | metagenome | 16S rRNA |
| W1328 | <i>A. m. carnica</i>   | sk11     | January | China: Jilin | 25.55 N 99.58 E | metagenome | 16S rRNA |
| W1376 | <i>A. m. carnica</i>   | sk12     | January | China: Jilin | 25.55 N 99.58 E | metagenome | 16S rRNA |
| W1378 | <i>A. m. carnica</i>   | sk12     | January | China: Jilin | 25.55 N 99.58 E | metagenome | 16S rRNA |
| W1428 | <i>A. m. mellifera</i> | jloh5140 | January | China: Jilin | 25.55 N 99.58 E | metagenome | 16S rRNA |
| W1430 | <i>A. m. mellifera</i> | jloh5140 | January | China: Jilin | 25.55 N 99.58 E | metagenome | 16S rRNA |
| W1432 | <i>A. m. mellifera</i> | jloh5140 | January | China: Jilin | 25.55 N 99.58 E | metagenome | 16S rRNA |
| W1492 | <i>A. m. mellifera</i> | jloh5127 | January | China: Jilin | 25.55 N 99.58 E | metagenome | 16S rRNA |
| W1494 | <i>A. m. mellifera</i> | jloh5127 | January | China: Jilin | 25.55 N 99.58 E | metagenome | 16S rRNA |
| W1496 | <i>A. m. mellifera</i> | jloh5127 | January | China: Jilin | 25.55 N 99.58 E | metagenome | 16S rRNA |
| W1570 | <i>A. m. carnica</i>   | jlsk3121 | January | China: Jilin | 25.55 N 99.58 E | metagenome | 16S rRNA |
| W1574 | <i>A. m. carnica</i>   | jlsk3121 | January | China: Jilin | 25.55 N 99.58 E | metagenome | 16S rRNA |
| W1576 | <i>A. m. carnica</i>   | jlsk3121 | January | China: Jilin | 25.55 N 99.58 E | metagenome | 16S rRNA |
| W1632 | <i>A. m. carnica</i>   | jlsk3028 | January | China: Jilin | 25.55 N 99.58 E | metagenome | 16S rRNA |
| W1634 | <i>A. m. carnica</i>   | jlsk3028 | January | China: Jilin | 25.55 N 99.58 E | metagenome | 16S rRNA |
| W1636 | <i>A. m. carnica</i>   | jlsk3028 | January | China: Jilin | 25.55 N 99.58 E | metagenome | —        |
| W1698 | <i>A. m. ligustica</i> | jlyy2060 | January | China: Jilin | 25.55 N 99.58 E | metagenome | 16S rRNA |
| W1702 | <i>A. m. ligustica</i> | jlyy2060 | January | China: Jilin | 25.55 N 99.58 E | metagenome | 16S rRNA |

---

---

|       |                        |          |         |              |                 |            |          |
|-------|------------------------|----------|---------|--------------|-----------------|------------|----------|
| W1712 | <i>A. m. ligustica</i> | jlyy2060 | January | China: Jilin | 25.55 N 99.58 E | metagenome | 16S rRNA |
| W1786 | <i>A. m. ligustica</i> | jlyy2061 | January | China: Jilin | 25.55 N 99.58 E | metagenome | 16S rRNA |
| W1788 | <i>A. m. ligustica</i> | jlyy2061 | January | China: Jilin | 25.55 N 99.58 E | metagenome | 16S rRNA |
| W1790 | <i>A. m. ligustica</i> | jlyy2061 | January | China: Jilin | 25.55 N 99.58 E | metagenome | 16S rRNA |
| W3858 | <i>A. m. carnica</i>   | sk11     | March   | China: Jilin | 25.55 N 99.58 E | metagenome | 16S rRNA |
| W3862 | <i>A. m. carnica</i>   | sk11     | March   | China: Jilin | 25.55 N 99.58 E | metagenome | 16S rRNA |
| W3864 | <i>A. m. carnica</i>   | sk11     | March   | China: Jilin | 25.55 N 99.58 E | metagenome | 16S rRNA |
| W3942 | <i>A. m. carnica</i>   | sk12     | March   | China: Jilin | 25.55 N 99.58 E | metagenome | 16S rRNA |
| W3944 | <i>A. m. carnica</i>   | sk12     | March   | China: Jilin | 25.55 N 99.58 E | metagenome | 16S rRNA |
| W3946 | <i>A. m. carnica</i>   | sk12     | March   | China: Jilin | 25.55 N 99.58 E | metagenome | 16S rRNA |
| W4194 | <i>A. m. carnica</i>   | jlsk3121 | March   | China: Jilin | 25.55 N 99.58 E | metagenome | 16S rRNA |
| W4196 | <i>A. m. carnica</i>   | jlsk3121 | March   | China: Jilin | 25.55 N 99.58 E | metagenome | 16S rRNA |
| W4198 | <i>A. m. carnica</i>   | jlsk3121 | March   | China: Jilin | 25.55 N 99.58 E | metagenome | 16S rRNA |
| W4268 | <i>A. m. carnica</i>   | jlsk3028 | March   | China: Jilin | 25.55 N 99.58 E | metagenome | 16S rRNA |
| W4272 | <i>A. m. carnica</i>   | jlsk3028 | March   | China: Jilin | 25.55 N 99.58 E | metagenome | 16S rRNA |
| W4274 | <i>A. m. carnica</i>   | jlsk3028 | March   | China: Jilin | 25.55 N 99.58 E | metagenome | 16S rRNA |
| W4352 | <i>A. m. ligustica</i> | jlyy2060 | March   | China: Jilin | 25.55 N 99.58 E | metagenome | 16S rRNA |
| W4354 | <i>A. m. ligustica</i> | jlyy2060 | March   | China: Jilin | 25.55 N 99.58 E | metagenome | 16S rRNA |
| W4356 | <i>A. m. ligustica</i> | jlyy2060 | March   | China: Jilin | 25.55 N 99.58 E | metagenome | 16S rRNA |

---

---

|       |                        |          |          |              |                 |            |          |
|-------|------------------------|----------|----------|--------------|-----------------|------------|----------|
| W4402 | <i>A. m. ligustica</i> | jlyy2061 | March    | China: Jilin | 25.55 N 99.58 E | metagenome | 16S rRNA |
| W4408 | <i>A. m. ligustica</i> | jlyy2061 | March    | China: Jilin | 25.55 N 99.58 E | metagenome | 16S rRNA |
| W4410 | <i>A. m. ligustica</i> | jlyy2061 | March    | China: Jilin | 25.55 N 99.58 E | metagenome | 16S rRNA |
| W4474 | <i>A. m. mellifera</i> | jloh5127 | March    | China: Jilin | 25.55 N 99.58 E | metagenome | 16S rRNA |
| W4478 | <i>A. m. mellifera</i> | jloh5127 | March    | China: Jilin | 25.55 N 99.58 E | metagenome | 16S rRNA |
| W4480 | <i>A. m. mellifera</i> | jloh5127 | March    | China: Jilin | 25.55 N 99.58 E | metagenome | 16S rRNA |
| W4526 | <i>A. m. mellifera</i> | jloh5140 | March    | China: Jilin | 25.55 N 99.58 E | metagenome | 16S rRNA |
| W4528 | <i>A. m. mellifera</i> | jloh5140 | March    | China: Jilin | 25.55 N 99.58 E | metagenome | 16S rRNA |
| W4530 | <i>A. m. mellifera</i> | jloh5140 | March    | China: Jilin | 25.55 N 99.58 E | metagenome | 16S rRNA |
| W0024 | <i>A. m. mellifera</i> | jloh5140 | November | China: Jilin | 25.55 N 99.58 E | —          | 16S rRNA |
| W0026 | <i>A. m. mellifera</i> | jloh5140 | November | China: Jilin | 25.55 N 99.58 E | —          | 16S rRNA |
| W0030 | <i>A. m. mellifera</i> | jloh5140 | November | China: Jilin | 25.55 N 99.58 E | —          | 16S rRNA |
| W0080 | <i>A. m. ligustica</i> | jlyy2061 | November | China: Jilin | 25.55 N 99.58 E | —          | 16S rRNA |
| W0082 | <i>A. m. ligustica</i> | jlyy2061 | November | China: Jilin | 25.55 N 99.58 E | —          | 16S rRNA |
| W0084 | <i>A. m. ligustica</i> | jlyy2061 | November | China: Jilin | 25.55 N 99.58 E | —          | 16S rRNA |
| W0147 | <i>A. m. ligustica</i> | jlyy2060 | November | China: Jilin | 25.55 N 99.58 E | —          | 16S rRNA |
| W0153 | <i>A. m. ligustica</i> | jlyy2060 | November | China: Jilin | 25.55 N 99.58 E | —          | 16S rRNA |
| W0161 | <i>A. m. ligustica</i> | jlyy2060 | November | China: Jilin | 25.55 N 99.58 E | —          | 16S rRNA |
| W0243 | <i>A. m. mellifera</i> | jloh5127 | November | China: Jilin | 25.55 N 99.58 E | —          | 16S rRNA |

---

---

|       |                        |          |          |              |                 |   |          |
|-------|------------------------|----------|----------|--------------|-----------------|---|----------|
| W0245 | <i>A. m. mellifera</i> | jloh5127 | November | China: Jilin | 25.55 N 99.58 E | — | 16S rRNA |
| W0251 | <i>A. m. mellifera</i> | jloh5127 | November | China: Jilin | 25.55 N 99.58 E | — | 16S rRNA |
| W0290 | <i>A. m. carnica</i>   | jlsk3121 | November | China: Jilin | 25.55 N 99.58 E | — | 16S rRNA |
| W0292 | <i>A. m. carnica</i>   | jlsk3121 | November | China: Jilin | 25.55 N 99.58 E | — | 16S rRNA |
| W0294 | <i>A. m. carnica</i>   | jlsk3121 | November | China: Jilin | 25.55 N 99.58 E | — | 16S rRNA |
| W0353 | <i>A. m. carnica</i>   | sk11     | November | China: Jilin | 25.55 N 99.58 E | — | 16S rRNA |
| W0355 | <i>A. m. carnica</i>   | sk11     | November | China: Jilin | 25.55 N 99.58 E | — | 16S rRNA |
| W0357 | <i>A. m. carnica</i>   | sk11     | November | China: Jilin | 25.55 N 99.58 E | — | 16S rRNA |
| W0401 | <i>A. m. carnica</i>   | jlsk3028 | November | China: Jilin | 25.55 N 99.58 E | — | 16S rRNA |
| W0403 | <i>A. m. carnica</i>   | jlsk3028 | November | China: Jilin | 25.55 N 99.58 E | — | 16S rRNA |
| W0419 | <i>A. m. carnica</i>   | jlsk3028 | November | China: Jilin | 25.55 N 99.58 E | — | 16S rRNA |
| W0466 | <i>A. m. carnica</i>   | sk12     | November | China: Jilin | 25.55 N 99.58 E | — | 16S rRNA |
| W0468 | <i>A. m. carnica</i>   | sk12     | November | China: Jilin | 25.55 N 99.58 E | — | 16S rRNA |
| W0490 | <i>A. m. carnica</i>   | sk12     | November | China: Jilin | 25.55 N 99.58 E | — | 16S rRNA |
| W1330 | <i>A. m. carnica</i>   | sk11     | January  | China: Jilin | 25.55 N 99.58 E | — | 16S rRNA |
| W1332 | <i>A. m. carnica</i>   | sk11     | January  | China: Jilin | 25.55 N 99.58 E | — | 16S rRNA |
| W1334 | <i>A. m. carnica</i>   | sk11     | January  | China: Jilin | 25.55 N 99.58 E | — | 16S rRNA |
| W1380 | <i>A. m. carnica</i>   | sk12     | January  | China: Jilin | 25.55 N 99.58 E | — | 16S rRNA |
| W1382 | <i>A. m. carnica</i>   | sk12     | January  | China: Jilin | 25.55 N 99.58 E | — | 16S rRNA |

---

---

|       |                        |          |         |              |                 |   |          |
|-------|------------------------|----------|---------|--------------|-----------------|---|----------|
| W1384 | <i>A. m. carnica</i>   | sk12     | January | China: Jilin | 25.55 N 99.58 E | — | 16S rRNA |
| W1434 | <i>A. m. mellifera</i> | jloh5140 | January | China: Jilin | 25.55 N 99.58 E | — | 16S rRNA |
| W1436 | <i>A. m. mellifera</i> | jloh5140 | January | China: Jilin | 25.55 N 99.58 E | — | 16S rRNA |
| W1438 | <i>A. m. mellifera</i> | jloh5140 | January | China: Jilin | 25.55 N 99.58 E | — | 16S rRNA |
| W1498 | <i>A. m. mellifera</i> | jloh5127 | January | China: Jilin | 25.55 N 99.58 E | — | 16S rRNA |
| W1500 | <i>A. m. mellifera</i> | jloh5127 | January | China: Jilin | 25.55 N 99.58 E | — | 16S rRNA |
| W1502 | <i>A. m. mellifera</i> | jloh5127 | January | China: Jilin | 25.55 N 99.58 E | — | 16S rRNA |
| W1578 | <i>A. m. carnica</i>   | jlsk3121 | January | China: Jilin | 25.55 N 99.58 E | — | 16S rRNA |
| W1580 | <i>A. m. carnica</i>   | jlsk3121 | January | China: Jilin | 25.55 N 99.58 E | — | 16S rRNA |
| W1582 | <i>A. m. carnica</i>   | jlsk3121 | January | China: Jilin | 25.55 N 99.58 E | — | 16S rRNA |
| W1638 | <i>A. m. carnica</i>   | jlsk3028 | January | China: Jilin | 25.55 N 99.58 E | — | 16S rRNA |
| W1640 | <i>A. m. carnica</i>   | jlsk3028 | January | China: Jilin | 25.55 N 99.58 E | — | 16S rRNA |
| W1642 | <i>A. m. carnica</i>   | jlsk3028 | January | China: Jilin | 25.55 N 99.58 E | — | 16S rRNA |
| W1694 | <i>A. m. ligustica</i> | jlyy2060 | January | China: Jilin | 25.55 N 99.58 E | — | 16S rRNA |
| W1696 | <i>A. m. ligustica</i> | jlyy2060 | January | China: Jilin | 25.55 N 99.58 E | — | 16S rRNA |
| W1706 | <i>A. m. ligustica</i> | jlyy2060 | January | China: Jilin | 25.55 N 99.58 E | — | 16S rRNA |
| W1792 | <i>A. m. ligustica</i> | jlyy2061 | January | China: Jilin | 25.55 N 99.58 E | — | 16S rRNA |
| W1794 | <i>A. m. ligustica</i> | jlyy2061 | January | China: Jilin | 25.55 N 99.58 E | — | 16S rRNA |
| W1796 | <i>A. m. ligustica</i> | jlyy2061 | January | China: Jilin | 25.55 N 99.58 E | — | 16S rRNA |

---

---

|       |                        |          |       |              |                 |   |          |
|-------|------------------------|----------|-------|--------------|-----------------|---|----------|
| W3872 | <i>A. m. carnica</i>   | sk11     | March | China: Jilin | 25.55 N 99.58 E | — | 16S rRNA |
| W3874 | <i>A. m. carnica</i>   | sk11     | March | China: Jilin | 25.55 N 99.58 E | — | 16S rRNA |
| W3876 | <i>A. m. carnica</i>   | sk11     | March | China: Jilin | 25.55 N 99.58 E | — | 16S rRNA |
| W3956 | <i>A. m. carnica</i>   | sk12     | March | China: Jilin | 25.55 N 99.58 E | — | 16S rRNA |
| W3958 | <i>A. m. carnica</i>   | sk12     | March | China: Jilin | 25.55 N 99.58 E | — | 16S rRNA |
| W3960 | <i>A. m. carnica</i>   | sk12     | March | China: Jilin | 25.55 N 99.58 E | — | 16S rRNA |
| W4212 | <i>A. m. carnica</i>   | jlsk3121 | March | China: Jilin | 25.55 N 99.58 E | — | 16S rRNA |
| W4214 | <i>A. m. carnica</i>   | jlsk3121 | March | China: Jilin | 25.55 N 99.58 E | — | 16S rRNA |
| W4216 | <i>A. m. carnica</i>   | jlsk3121 | March | China: Jilin | 25.55 N 99.58 E | — | 16S rRNA |
| W4282 | <i>A. m. carnica</i>   | jlsk3028 | March | China: Jilin | 25.55 N 99.58 E | — | 16S rRNA |
| W4284 | <i>A. m. carnica</i>   | jlsk3028 | March | China: Jilin | 25.55 N 99.58 E | — | 16S rRNA |
| W4286 | <i>A. m. carnica</i>   | jlsk3028 | March | China: Jilin | 25.55 N 99.58 E | — | 16S rRNA |
| W4366 | <i>A. m. ligustica</i> | jlyy2060 | March | China: Jilin | 25.55 N 99.58 E | — | 16S rRNA |
| W4368 | <i>A. m. ligustica</i> | jlyy2060 | March | China: Jilin | 25.55 N 99.58 E | — | 16S rRNA |
| W4370 | <i>A. m. ligustica</i> | jlyy2060 | March | China: Jilin | 25.55 N 99.58 E | — | 16S rRNA |
| W4414 | <i>A. m. ligustica</i> | jlyy2061 | March | China: Jilin | 25.55 N 99.58 E | — | 16S rRNA |
| W4416 | <i>A. m. ligustica</i> | jlyy2061 | March | China: Jilin | 25.55 N 99.58 E | — | 16S rRNA |
| W4418 | <i>A. m. ligustica</i> | jlyy2061 | March | China: Jilin | 25.55 N 99.58 E | — | 16S rRNA |
| W4488 | <i>A. m. mellifera</i> | jloh5127 | March | China: Jilin | 25.55 N 99.58 E | — | 16S rRNA |

---



---

|       |                        |          |       |              |                 |   |          |
|-------|------------------------|----------|-------|--------------|-----------------|---|----------|
| W4490 | <i>A. m. mellifera</i> | jloh5127 | March | China: Jilin | 25.55 N 99.58 E | — | 16S rRNA |
| W4492 | <i>A. m. mellifera</i> | jloh5127 | March | China: Jilin | 25.55 N 99.58 E | — | 16S rRNA |
| W4540 | <i>A. m. mellifera</i> | jloh5140 | March | China: Jilin | 25.55 N 99.58 E | — | 16S rRNA |
| W4542 | <i>A. m. mellifera</i> | jloh5140 | March | China: Jilin | 25.55 N 99.58 E | — | 16S rRNA |
| W4544 | <i>A. m. mellifera</i> | jloh5140 | March | China: Jilin | 25.55 N 99.58 E | — | 16S rRNA |
| W4894 | <i>A. m. mellifera</i> | jloh5140 | April | China: Jilin | 25.55 N 99.58 E | — | 16S rRNA |
| W4896 | <i>A. m. mellifera</i> | jloh5140 | April | China: Jilin | 25.55 N 99.58 E | — | 16S rRNA |
| W4898 | <i>A. m. mellifera</i> | jloh5140 | April | China: Jilin | 25.55 N 99.58 E | — | 16S rRNA |
| W4900 | <i>A. m. mellifera</i> | jloh5140 | April | China: Jilin | 25.55 N 99.58 E | — | 16S rRNA |
| W4902 | <i>A. m. mellifera</i> | jloh5140 | April | China: Jilin | 25.55 N 99.58 E | — | 16S rRNA |
| W4904 | <i>A. m. mellifera</i> | jloh5140 | April | China: Jilin | 25.55 N 99.58 E | — | 16S rRNA |
| W5002 | <i>A. m. mellifera</i> | jloh5140 | April | China: Jilin | 25.55 N 99.58 E | — | 16S rRNA |
| W5004 | <i>A. m. mellifera</i> | jloh5140 | April | China: Jilin | 25.55 N 99.58 E | — | 16S rRNA |
| W5006 | <i>A. m. mellifera</i> | jloh5140 | April | China: Jilin | 25.55 N 99.58 E | — | 16S rRNA |
| W5008 | <i>A. m. mellifera</i> | jloh5140 | April | China: Jilin | 25.55 N 99.58 E | — | 16S rRNA |
| W5010 | <i>A. m. mellifera</i> | jloh5140 | April | China: Jilin | 25.55 N 99.58 E | — | 16S rRNA |
| W5012 | <i>A. m. mellifera</i> | jloh5140 | April | China: Jilin | 25.55 N 99.58 E | — | 16S rRNA |
| W5158 | <i>A. m. carnica</i>   | jlsk3028 | April | China: Jilin | 25.55 N 99.58 E | — | 16S rRNA |
| W5160 | <i>A. m. carnica</i>   | jlsk3028 | April | China: Jilin | 25.55 N 99.58 E | — | 16S rRNA |

---

---

|       |                      |          |       |              |                 |   |          |
|-------|----------------------|----------|-------|--------------|-----------------|---|----------|
| W5162 | <i>A. m. carnica</i> | jlsk3028 | April | China: Jilin | 25.55 N 99.58 E | — | 16S rRNA |
| W5164 | <i>A. m. carnica</i> | jlsk3028 | April | China: Jilin | 25.55 N 99.58 E | — | 16S rRNA |
| W5166 | <i>A. m. carnica</i> | jlsk3028 | April | China: Jilin | 25.55 N 99.58 E | — | 16S rRNA |
| W5168 | <i>A. m. carnica</i> | jlsk3028 | April | China: Jilin | 25.55 N 99.58 E | — | 16S rRNA |
| W5210 | <i>A. m. carnica</i> | jlsk3028 | April | China: Jilin | 25.55 N 99.58 E | — | 16S rRNA |
| W5212 | <i>A. m. carnica</i> | jlsk3028 | April | China: Jilin | 25.55 N 99.58 E | — | 16S rRNA |
| W5214 | <i>A. m. carnica</i> | jlsk3028 | April | China: Jilin | 25.55 N 99.58 E | — | 16S rRNA |
| W5216 | <i>A. m. carnica</i> | jlsk3028 | April | China: Jilin | 25.55 N 99.58 E | — | 16S rRNA |
| W5218 | <i>A. m. carnica</i> | jlsk3028 | April | China: Jilin | 25.55 N 99.58 E | — | 16S rRNA |
| W5220 | <i>A. m. carnica</i> | jlsk3028 | April | China: Jilin | 25.55 N 99.58 E | — | 16S rRNA |
| W5328 | <i>A. m. carnica</i> | jlsk3121 | April | China: Jilin | 25.55 N 99.58 E | — | 16S rRNA |
| W5330 | <i>A. m. carnica</i> | jlsk3121 | April | China: Jilin | 25.55 N 99.58 E | — | 16S rRNA |
| W5332 | <i>A. m. carnica</i> | jlsk3121 | April | China: Jilin | 25.55 N 99.58 E | — | 16S rRNA |
| W5334 | <i>A. m. carnica</i> | jlsk3121 | April | China: Jilin | 25.55 N 99.58 E | — | 16S rRNA |
| W5336 | <i>A. m. carnica</i> | jlsk3121 | April | China: Jilin | 25.55 N 99.58 E | — | 16S rRNA |
| W5338 | <i>A. m. carnica</i> | jlsk3121 | April | China: Jilin | 25.55 N 99.58 E | — | 16S rRNA |
| W5402 | <i>A. m. carnica</i> | jlsk3121 | April | China: Jilin | 25.55 N 99.58 E | — | 16S rRNA |
| W5404 | <i>A. m. carnica</i> | jlsk3121 | April | China: Jilin | 25.55 N 99.58 E | — | 16S rRNA |
| W5406 | <i>A. m. carnica</i> | jlsk3121 | April | China: Jilin | 25.55 N 99.58 E | — | 16S rRNA |

---

---

|       |                        |          |       |              |                 |   |          |
|-------|------------------------|----------|-------|--------------|-----------------|---|----------|
| W5408 | <i>A. m. carnica</i>   | jlsk3121 | April | China: Jilin | 25.55 N 99.58 E | — | 16S rRNA |
| W5410 | <i>A. m. carnica</i>   | jlsk3121 | April | China: Jilin | 25.55 N 99.58 E | — | 16S rRNA |
| W5412 | <i>A. m. carnica</i>   | jlsk3121 | April | China: Jilin | 25.55 N 99.58 E | — | 16S rRNA |
| W5578 | <i>A. m. ligustica</i> | jlyy2060 | April | China: Jilin | 25.55 N 99.58 E | — | 16S rRNA |
| W5580 | <i>A. m. ligustica</i> | jlyy2060 | April | China: Jilin | 25.55 N 99.58 E | — | 16S rRNA |
| W5582 | <i>A. m. ligustica</i> | jlyy2060 | April | China: Jilin | 25.55 N 99.58 E | — | 16S rRNA |
| W5584 | <i>A. m. ligustica</i> | jlyy2060 | April | China: Jilin | 25.55 N 99.58 E | — | 16S rRNA |
| W5586 | <i>A. m. ligustica</i> | jlyy2060 | April | China: Jilin | 25.55 N 99.58 E | — | 16S rRNA |
| W5588 | <i>A. m. ligustica</i> | jlyy2060 | April | China: Jilin | 25.55 N 99.58 E | — | 16S rRNA |
| W5628 | <i>A. m. ligustica</i> | jlyy2060 | April | China: Jilin | 25.55 N 99.58 E | — | 16S rRNA |
| W5630 | <i>A. m. ligustica</i> | jlyy2060 | April | China: Jilin | 25.55 N 99.58 E | — | 16S rRNA |
| W5632 | <i>A. m. ligustica</i> | jlyy2060 | April | China: Jilin | 25.55 N 99.58 E | — | 16S rRNA |
| W5634 | <i>A. m. ligustica</i> | jlyy2060 | April | China: Jilin | 25.55 N 99.58 E | — | 16S rRNA |
| W5636 | <i>A. m. ligustica</i> | jlyy2060 | April | China: Jilin | 25.55 N 99.58 E | — | 16S rRNA |
| W5638 | <i>A. m. ligustica</i> | jlyy2060 | April | China: Jilin | 25.55 N 99.58 E | — | 16S rRNA |
| W5890 | <i>A. m. ligustica</i> | jlyy2061 | April | China: Jilin | 25.55 N 99.58 E | — | 16S rRNA |
| W5892 | <i>A. m. ligustica</i> | jlyy2061 | April | China: Jilin | 25.55 N 99.58 E | — | 16S rRNA |
| W5894 | <i>A. m. ligustica</i> | jlyy2061 | April | China: Jilin | 25.55 N 99.58 E | — | 16S rRNA |
| W5896 | <i>A. m. ligustica</i> | jlyy2061 | April | China: Jilin | 25.55 N 99.58 E | — | 16S rRNA |

---

---

|       |                        |          |       |              |                 |   |          |
|-------|------------------------|----------|-------|--------------|-----------------|---|----------|
| W5898 | <i>A. m. ligustica</i> | jlyy2061 | April | China: Jilin | 25.55 N 99.58 E | — | 16S rRNA |
| W5900 | <i>A. m. ligustica</i> | jlyy2061 | April | China: Jilin | 25.55 N 99.58 E | — | 16S rRNA |
| W5942 | <i>A. m. ligustica</i> | jlyy2061 | April | China: Jilin | 25.55 N 99.58 E | — | 16S rRNA |
| W5944 | <i>A. m. ligustica</i> | jlyy2061 | April | China: Jilin | 25.55 N 99.58 E | — | 16S rRNA |
| W5946 | <i>A. m. ligustica</i> | jlyy2061 | April | China: Jilin | 25.55 N 99.58 E | — | 16S rRNA |
| W5948 | <i>A. m. ligustica</i> | jlyy2061 | April | China: Jilin | 25.55 N 99.58 E | — | 16S rRNA |
| W5950 | <i>A. m. ligustica</i> | jlyy2061 | April | China: Jilin | 25.55 N 99.58 E | — | 16S rRNA |
| W5952 | <i>A. m. ligustica</i> | jlyy2061 | April | China: Jilin | 25.55 N 99.58 E | — | 16S rRNA |
| W6106 | <i>A. m. carnica</i>   | sk11     | April | China: Jilin | 25.55 N 99.58 E | — | 16S rRNA |
| W6110 | <i>A. m. carnica</i>   | sk11     | April | China: Jilin | 25.55 N 99.58 E | — | 16S rRNA |
| W6112 | <i>A. m. carnica</i>   | sk11     | April | China: Jilin | 25.55 N 99.58 E | — | 16S rRNA |
| W6114 | <i>A. m. carnica</i>   | sk11     | April | China: Jilin | 25.55 N 99.58 E | — | 16S rRNA |
| W6116 | <i>A. m. carnica</i>   | sk11     | April | China: Jilin | 25.55 N 99.58 E | — | 16S rRNA |
| W6118 | <i>A. m. carnica</i>   | sk11     | April | China: Jilin | 25.55 N 99.58 E | — | 16S rRNA |
| W6160 | <i>A. m. carnica</i>   | sk12     | April | China: Jilin | 25.55 N 99.58 E | — | 16S rRNA |
| W6162 | <i>A. m. carnica</i>   | sk12     | April | China: Jilin | 25.55 N 99.58 E | — | 16S rRNA |
| W6164 | <i>A. m. carnica</i>   | sk12     | April | China: Jilin | 25.55 N 99.58 E | — | 16S rRNA |
| W6166 | <i>A. m. carnica</i>   | sk12     | April | China: Jilin | 25.55 N 99.58 E | — | 16S rRNA |
| W6168 | <i>A. m. carnica</i>   | sk12     | April | China: Jilin | 25.55 N 99.58 E | — | 16S rRNA |

---

---

|        |                        |          |       |              |                 |   |          |
|--------|------------------------|----------|-------|--------------|-----------------|---|----------|
| W6170  | <i>A. m. carnica</i>   | sk12     | April | China: Jilin | 25.55 N 99.58 E | — | 16S rRNA |
| B11502 | <i>A. m. carnica</i>   | jlsk3121 | Jun   | China: Jilin | 25.55 N 99.58 E |   | 16S rRNA |
| B11503 | <i>A. m. carnica</i>   | jlsk3121 | Jun   | China: Jilin | 25.55 N 99.58 E |   | 16S rRNA |
| B11504 | <i>A. m. carnica</i>   | jlsk3121 | Jun   | China: Jilin | 25.55 N 99.58 E |   | 16S rRNA |
| B11505 | <i>A. m. carnica</i>   | jlsk3121 | Jun   | China: Jilin | 25.55 N 99.58 E |   | 16S rRNA |
| B11506 | <i>A. m. carnica</i>   | jlsk3121 | Jun   | China: Jilin | 25.55 N 99.58 E |   | 16S rRNA |
| B11551 | <i>A. m. carnica</i>   | jlsk3028 | Jun   | China: Jilin | 25.55 N 99.58 E |   | 16S rRNA |
| B11552 | <i>A. m. carnica</i>   | jlsk3028 | Jun   | China: Jilin | 25.55 N 99.58 E |   | 16S rRNA |
| B11553 | <i>A. m. carnica</i>   | jlsk3028 | Jun   | China: Jilin | 25.55 N 99.58 E |   | 16S rRNA |
| B11555 | <i>A. m. carnica</i>   | jlsk3028 | Jun   | China: Jilin | 25.55 N 99.58 E |   | 16S rRNA |
| B11556 | <i>A. m. carnica</i>   | jlsk3028 | Jun   | China: Jilin | 25.55 N 99.58 E |   | 16S rRNA |
| B9831  | <i>A. m. mellifera</i> | jloh5140 | Jun   | China: Jilin | 25.55 N 99.58 E |   | 16S rRNA |
| B9832  | <i>A. m. mellifera</i> | jloh5140 | Jun   | China: Jilin | 25.55 N 99.58 E |   | 16S rRNA |
| B9834  | <i>A. m. mellifera</i> | jloh5140 | Jun   | China: Jilin | 25.55 N 99.58 E |   | 16S rRNA |
| B9835  | <i>A. m. mellifera</i> | jloh5140 | Jun   | China: Jilin | 25.55 N 99.58 E |   | 16S rRNA |
| B9836  | <i>A. m. mellifera</i> | jloh5140 | Jun   | China: Jilin | 25.55 N 99.58 E |   | 16S rRNA |
| B9883  | <i>A. m. mellifera</i> | jlyy2061 | Jun   | China: Jilin | 25.55 N 99.58 E |   | 16S rRNA |
| B9884  | <i>A. m. ligustica</i> | jlyy2061 | Jun   | China: Jilin | 25.55 N 99.58 E |   | 16S rRNA |
| B9885  | <i>A. m. ligustica</i> | jlyy2061 | Jun   | China: Jilin | 25.55 N 99.58 E |   | 16S rRNA |

---

---

|        |                        |          |     |              |                 |            |          |
|--------|------------------------|----------|-----|--------------|-----------------|------------|----------|
| B9886  | <i>A. m. ligustica</i> | jlyy2061 | Jun | China: Jilin | 25.55 N 99.58 E |            | 16S rRNA |
| B9887  | <i>A. m. ligustica</i> | jlyy2061 | Jun | China: Jilin | 25.55 N 99.58 E |            | 16S rRNA |
| B9932  | <i>A. m. ligustica</i> | jlyy2060 | Jun | China: Jilin | 25.55 N 99.58 E |            | 16S rRNA |
| B9934  | <i>A. m. ligustica</i> | jlyy2060 | Jun | China: Jilin | 25.55 N 99.58 E |            | 16S rRNA |
| B9935  | <i>A. m. ligustica</i> | jlyy2060 | Jun | China: Jilin | 25.55 N 99.58 E |            | 16S rRNA |
| B9936  | <i>A. m. ligustica</i> | jlyy2060 | Jun | China: Jilin | 25.55 N 99.58 E |            | 16S rRNA |
| B9937  | <i>A. m. ligustica</i> | jlyy2060 | Jun | China: Jilin | 25.55 N 99.58 E |            | 16S rRNA |
| B11501 | <i>A. m. carnica</i>   | jlsk3028 | Jun | China: Jilin | 25.55 N 99.58 E | metagenome | —        |
| B11504 | <i>A. m. carnica</i>   | jlsk3028 | Jun | China: Jilin | 25.55 N 99.58 E | metagenome | —        |
| B11507 | <i>A. m. carnica</i>   | jlsk3028 | Jun | China: Jilin | 25.55 N 99.58 E | metagenome | —        |
| B11508 | <i>A. m. carnica</i>   | jlsk3028 | Jun | China: Jilin | 25.55 N 99.58 E | metagenome | —        |
| B11509 | <i>A. m. carnica</i>   | jlsk3028 | Jun | China: Jilin | 25.55 N 99.58 E | metagenome | —        |
| B11510 | <i>A. m. carnica</i>   | jlsk3028 | Jun | China: Jilin | 25.55 N 99.58 E | metagenome | —        |
| B11554 | <i>A. m. carnica</i>   | jlsk3121 | Jun | China: Jilin | 25.55 N 99.58 E | metagenome | —        |
| B11555 | <i>A. m. carnica</i>   | jlsk3121 | Jun | China: Jilin | 25.55 N 99.58 E | metagenome | —        |
| B11557 | <i>A. m. carnica</i>   | jlsk3121 | Jun | China: Jilin | 25.55 N 99.58 E | metagenome | —        |
| B11558 | <i>A. m. carnica</i>   | jlsk3121 | Jun | China: Jilin | 25.55 N 99.58 E | metagenome | —        |
| B11559 | <i>A. m. carnica</i>   | jlsk3121 | Jun | China: Jilin | 25.55 N 99.58 E | metagenome | —        |
| B11560 | <i>A. m. carnica</i>   | jlsk3121 | Jun | China: Jilin | 25.55 N 99.58 E | metagenome | —        |

---

---

|       |                        |          |     |              |                 |            |   |
|-------|------------------------|----------|-----|--------------|-----------------|------------|---|
| B9832 | <i>A. m. mellifera</i> | jloh5140 | Jun | China: Jilin | 25.55 N 99.58 E | metagenome | — |
| B9833 | <i>A. m. mellifera</i> | jloh5140 | Jun | China: Jilin | 25.55 N 99.58 E | metagenome | — |
| B9838 | <i>A. m. mellifera</i> | jloh5140 | Jun | China: Jilin | 25.55 N 99.58 E | metagenome | — |
| B9839 | <i>A. m. mellifera</i> | jloh5140 | Jun | China: Jilin | 25.55 N 99.58 E | metagenome | — |
| B9840 | <i>A. m. mellifera</i> | jloh5140 | Jun | China: Jilin | 25.55 N 99.58 E | metagenome | — |
| B9841 | <i>A. m. mellifera</i> | jloh5140 | Jun | China: Jilin | 25.55 N 99.58 E | metagenome | — |
| B9842 | <i>A. m. mellifera</i> | jloh5140 | Jun | China: Jilin | 25.55 N 99.58 E | metagenome | — |
| B9843 | <i>A. m. mellifera</i> | jloh5140 | Jun | China: Jilin | 25.55 N 99.58 E | metagenome | — |
| B9846 | <i>A. m. mellifera</i> | jloh5140 | Jun | China: Jilin | 25.55 N 99.58 E | metagenome | — |
| B9848 | <i>A. m. mellifera</i> | jloh5140 | Jun | China: Jilin | 25.55 N 99.58 E | metagenome | — |
| B9849 | <i>A. m. mellifera</i> | jloh5140 | Jun | China: Jilin | 25.55 N 99.58 E | metagenome | — |
| B9850 | <i>A. m. mellifera</i> | jloh5140 | Jun | China: Jilin | 25.55 N 99.58 E | metagenome | — |
| B9851 | <i>A. m. mellifera</i> | jloh5140 | Jun | China: Jilin | 25.55 N 99.58 E | metagenome | — |
| B9852 | <i>A. m. mellifera</i> | jloh5140 | Jun | China: Jilin | 25.55 N 99.58 E | metagenome | — |
| B9854 | <i>A. m. mellifera</i> | jloh5140 | Jun | China: Jilin | 25.55 N 99.58 E | metagenome | — |
| B9855 | <i>A. m. mellifera</i> | jloh5140 | Jun | China: Jilin | 25.55 N 99.58 E | metagenome | — |
| B9856 | <i>A. m. mellifera</i> | jloh5140 | Jun | China: Jilin | 25.55 N 99.58 E | metagenome | — |
| B9857 | <i>A. m. mellifera</i> | jloh5140 | Jun | China: Jilin | 25.55 N 99.58 E | metagenome | — |
| B9858 | <i>A. m. mellifera</i> | jloh5140 | Jun | China: Jilin | 25.55 N 99.58 E | metagenome | — |

---

---

|       |                        |          |     |              |                 |            |   |
|-------|------------------------|----------|-----|--------------|-----------------|------------|---|
| B9859 | <i>A. m. mellifera</i> | jloh5140 | Jun | China: Jilin | 25.55 N 99.58 E | metagenome | — |
| B9860 | <i>A. m. mellifera</i> | jloh5140 | Jun | China: Jilin | 25.55 N 99.58 E | metagenome | — |
| B9861 | <i>A. m. mellifera</i> | jloh5140 | Jun | China: Jilin | 25.55 N 99.58 E | metagenome | — |
| B9862 | <i>A. m. mellifera</i> | jloh5140 | Jun | China: Jilin | 25.55 N 99.58 E | metagenome | — |
| B9863 | <i>A. m. mellifera</i> | jloh5140 | Jun | China: Jilin | 25.55 N 99.58 E | metagenome | — |
| B9864 | <i>A. m. mellifera</i> | jloh5140 | Jun | China: Jilin | 25.55 N 99.58 E | metagenome | — |
| B9865 | <i>A. m. mellifera</i> | jloh5140 | Jun | China: Jilin | 25.55 N 99.58 E | metagenome | — |
| B9866 | <i>A. m. mellifera</i> | jloh5140 | Jun | China: Jilin | 25.55 N 99.58 E | metagenome | — |
| B9867 | <i>A. m. mellifera</i> | jloh5140 | Jun | China: Jilin | 25.55 N 99.58 E | metagenome | — |
| B9868 | <i>A. m. mellifera</i> | jloh5140 | Jun | China: Jilin | 25.55 N 99.58 E | metagenome | — |
| B9869 | <i>A. m. mellifera</i> | jloh5140 | Jun | China: Jilin | 25.55 N 99.58 E | metagenome | — |
| B9870 | <i>A. m. mellifera</i> | jloh5140 | Jun | China: Jilin | 25.55 N 99.58 E | metagenome | — |
| B9871 | <i>A. m. mellifera</i> | jloh5140 | Jun | China: Jilin | 25.55 N 99.58 E | metagenome | — |
| B9881 | <i>A. m. ligustica</i> | jlyy2060 | Jun | China: Jilin | 25.55 N 99.58 E | metagenome | — |
| B9883 | <i>A. m. ligustica</i> | jlyy2060 | Jun | China: Jilin | 25.55 N 99.58 E | metagenome | — |
| B9889 | <i>A. m. ligustica</i> | jlyy2060 | Jun | China: Jilin | 25.55 N 99.58 E | metagenome | — |
| B9890 | <i>A. m. ligustica</i> | jlyy2060 | Jun | China: Jilin | 25.55 N 99.58 E | metagenome | — |
| B9891 | <i>A. m. ligustica</i> | jlyy2060 | Jun | China: Jilin | 25.55 N 99.58 E | metagenome | — |
| B9892 | <i>A. m. ligustica</i> | jlyy2060 | Jun | China: Jilin | 25.55 N 99.58 E | metagenome | — |

---



---

|       |                        |          |     |              |                 |            |   |
|-------|------------------------|----------|-----|--------------|-----------------|------------|---|
| B9933 | <i>A. m. ligustica</i> | jlyy2061 | Jun | China: Jilin | 25.55 N 99.58 E | metagenome | — |
| B9938 | <i>A. m. ligustica</i> | jlyy2061 | Jun | China: Jilin | 25.55 N 99.58 E | metagenome | — |
| B9939 | <i>A. m. ligustica</i> | jlyy2061 | Jun | China: Jilin | 25.55 N 99.58 E | metagenome | — |
| B9940 | <i>A. m. ligustica</i> | jlyy2061 | Jun | China: Jilin | 25.55 N 99.58 E | metagenome | — |
| B9941 | <i>A. m. ligustica</i> | jlyy2061 | Jun | China: Jilin | 25.55 N 99.58 E | metagenome | — |
| B9942 | <i>A. m. ligustica</i> | jlyy2061 | Jun | China: Jilin | 25.55 N 99.58 E | metagenome | — |

---
