# Supplementary material for: Community Dynamics in Structure and Function of Honey Bee Gut Bacteria in Response to Winter Dietary Shift
Source: PubMed Central journal article supplement (PMC9600256; doi:10.1128/mbio.01131-22), 2022-08-29
Supplement: mbio.01131-22-s0002.pdf [file mbio.01131-22-s0002.pdf]

| pathway                                             | compound_name                | June      |           |           | November  |           |           | January   |           |           | March     |           |           |
|-----------------------------------------------------|------------------------------|-----------|-----------|-----------|-----------|-----------|-----------|-----------|-----------|-----------|-----------|-----------|-----------|
|                                                     |                              | B11524    | B11525    | B11526    | W6950     | W6952     | W6954     | W2042     | W2044     | W2046     | W3394     | W3396     | W3398     |
| Pollen metabolites                                  | Keracyanin                   | 9383933.9 | 3804478.3 | 7073544.3 | 92310.394 | 55939.531 | 35393.669 | 60400     | 58231.497 | 56090.951 | 44289.477 | 55719.585 | 66780.101 |
|                                                     | Kaempferol                   | 31036411  | 47169921  | 25649584  | 459667.31 | 159303.4  | 119730.59 | 122039.81 | 74903.677 | 81424.459 | 265134.13 | 724292.07 | 72418.332 |
|                                                     | Quercitrin                   | 268449.04 | 494597.75 | 529423.23 | 75809.489 | 78162.079 | 36807.284 | 49840.969 | 75088.533 | 46421.062 | 53854.663 | 57590.491 | 61809.068 |
|                                                     | 9,10-Dihydroxystearic acid   | 45482913  | 52795333  | 60043235  | 4620712.5 | 8013367.4 | 62291193  | 4009416.9 | 4643405.5 | 17343736  | 5821511.6 | 9043565.2 | 11505611  |
|                                                     | tricoumaroyl spermidine      | 1414281.7 | 4802312.1 | 10196465  | 42680.364 | 35305.869 | 70090.342 | 35102.929 | 45013.667 | 33054.798 | 32569.901 | 43525.368 | 45519.846 |
|                                                     | Spermidine                   | 54178243  | 44233079  | 50858113  | 45459894  | 15072186  | 22054417  | 26879577  | 30738408  | 9766931.9 | 6194040.1 | 4645456.6 | 14805750  |
| Phenylalanine, tyrosine and tryptophan biosynthesis | (-)-Chorismic acid           | 65333.612 | 50286.849 | 56706.895 | 92022.889 | 85868.916 | 76064.709 | 86929.831 | 76429.281 | 139611.46 | 75721.52  | 147739    | 109962.47 |
|                                                     | 4-Hydroxyphenylpyruvic acid  | 430780.65 | 911216.65 | 257854.91 | 50754.159 | 62671.571 | 53009.58  | 43297.998 | 41376.837 | 48087.502 | 45013.481 | 31922.058 | 131216.85 |
|                                                     | D-(-)-Quinic acid            | 437154.32 | 324416.47 | 460784.54 | 1605521.4 | 1257788.6 | 2381041.2 | 2003594.6 | 2600524.4 | 4701429.3 | 4728539.7 | 4466573.9 | 1400894.7 |
|                                                     | D-Erythrose 4-phosphate      | 596106.82 | 566219.14 | 712119.87 | 1427825.7 | 1113771.9 | 1026391.1 | 1016987.6 | 836950.03 | 978728.78 | 802704.03 | 531305.83 | 876918.69 |
|                                                     | D-Sedoheptulose 7-phosphate  | 299754.5  | 374221.82 | 535451.29 | 676303.15 | 994674.92 | 673173.15 | 312056.02 | 200486.76 | 202428.17 | 191813.32 | 69219.396 | 86437.975 |
|                                                     | Shikimic Acid                | 292572.84 | 249028.25 | 280791.52 | 901332.84 | 454443.66 | 2006086   | 1347251.6 | 1973915.6 | 3887817.9 | 1776552.7 | 1540235.1 | 1016708.3 |
|                                                     | pretyrosine                  | 950072.22 | 1124759.5 | 1621962.2 | 1790770.1 | 640060.46 | 870993.56 | 1442299.4 | 1756713.2 | 1366364.4 | 3115226.1 | 2539968   | 3025826.6 |
| Tryptophan metabolism                               | 5-Hydroxy-N-formylkynurenine | 9704.1072 | 6140.0005 | 8179.6158 | 11646.85  | 11005.106 | 6411.2329 | 12304.912 | 11154.808 | 12643.247 | 23371.235 | 24672.989 | 21576.764 |
|                                                     | Formylkynurenine             | 10012821  | 1992077.9 | 3865793.2 | 2912562.3 | 300712.73 | 163250.56 | 493768.2  | 96485.931 | 108314.48 | 506344.95 | 738836.4  | 120999.04 |
|                                                     | L-3-hydroxykynurenine        | 522985.02 | 676804.33 | 994483.01 | 346871.87 | 102220.79 | 419418.37 | 313315.89 | 798055.18 | 419379.44 | 1111268.8 | 1248413   | 2743819.4 |
|                                                     | L-Kynurenine                 | 2350773.1 | 4546097.7 | 2683833.2 | 17515035  | 832511.01 | 266762.21 | 237771.43 | 252324.44 | 226051.95 | 537352.51 | 1896035.6 | 366893.49 |
|                                                     | Tryptamine                   | 86925.321 | 134155.64 | 59895.239 | 131737.46 | 50072.484 | 321180.65 | 725470.97 | 304639.33 | 143146.86 | 253028.94 | 299375.83 | 142817.54 |
|                                                     | 5-Hydroxytryptophan          | 358518.85 | 209140.62 | 212705.82 | 771274.19 | 301715.17 | 429863.32 | 226235.56 | 269433.32 | 250438.19 | 193746.12 | 309155.59 | 143573.97 |
|                                                     | Serotonin                    | 52034.496 | 236664.4  | 40450.159 | 130294.94 | 85914.072 | 125278.87 | 82035.849 | 64164.444 | 91635.43  | 42016.11  | 149437.5  | 22839.477 |
| Tyrosine metabolism                                 | L-Dopa                       | 5424380.1 | 3731558.5 | 3328505.7 | 1717854.5 | 1918210.6 | 1193660.3 | 972391.29 | 906760.72 | 1452567   | 2576968   | 1474691   | 855212.46 |
|                                                     | Tyramine                     | 548271.67 | 913730.7  | 496814.7  | 944741.71 | 573373.49 | 2687968.1 | 2680948.8 | 2482720.4 | 1814530.7 | 1437553.7 | 5310461.9 | 710198.44 |
