# Supplementary material for: Community Dynamics in Structure and Function of Honey Bee Gut Bacteria in Response to Winter Dietary Shift
Source: PubMed Central journal article supplement (PMC9600256; doi:10.1128/mbio.01131-22), 2022-08-29
Supplement: mbio.01131-22-s0005.pdf [file mbio.01131-22-s0005.pdf]

| Species                            | Strain                | Host                            | Size Mbp | Contig   | Accession       |
|------------------------------------|-----------------------|---------------------------------|----------|----------|-----------------|
| <i>Bartonella apis</i>             | W7133                 | <i>Apis mellifera</i>           | 2.6      | Complete |                 |
| <i>Bartonella apis</i>             | BBC0122               | <i>Apis mellifera</i>           | 2.91     | Complete | CP015625        |
| <i>Bartonella apis</i>             | BBC0178               | <i>Apis mellifera</i>           | 2.6      | Complete | CP015820        |
| <i>Bartonella apis</i>             | BBC0244               | <i>Apis mellifera</i>           | 2.64     | Complete | CP015821        |
| <i>Bartonella apis</i>             | PEB0122               | <i>Apis mellifera</i>           | 2.6      | 16       | LXYU00000000    |
| <i>Bartonella apis</i>             | PEB0149               | <i>Apis mellifera</i>           | 2.53     | 7        | LXYT00000000    |
| <i>Bartonella apis</i>             | PEB0150               | <i>Apis mellifera</i>           | 2.58     | 12       | LXYS00000000    |
| <i>Bifidobacterium asteroides</i>  | DSM 20089             | <i>Apis mellifera</i>           | 2.14     | 115      | JDTU00000000    |
| <i>Bifidobacterium asteroides</i>  | PRL2011               | <i>Apis mellifera ligustica</i> | 2.17     | Complete | NC_018720       |
| <i>Bifidobacterium asteroides</i>  | ESL0170               | <i>Apis mellifera</i>           | 2.18     | 7        | NZ_QGLH00000000 |
| <i>Bifidobacterium asteroides</i>  | Hma3                  | <i>Apis mellifera</i>           | 2.25     | 16       | KQ034040        |
| <i>Bifidobacterium asteroides</i>  | wkB338                | <i>Apis mellifera</i>           | 2.19     | 49       | NPOR00000000    |
| <i>Bifidobacterium asteroides</i>  | ESL0198               | <i>Apis mellifera</i>           | 2.24     | 12       | NZ_QGLJ00000000 |
| <i>Bifidobacterium asteroides</i>  | ESL0199               | <i>Apis mellifera</i>           | 2.17     | 7        | NZ_QGLK00000000 |
| <i>Bifidobacterium asteroides</i>  | ESL0200               | <i>Apis mellifera</i>           | 1.93     | 16       | NZ_QGLL00000000 |
| <i>Bifidobacterium coryneforme</i> | Bma6                  | <i>Apis mellifera</i>           | 1.75     | 6        | JXBX00000000    |
| <i>Bifidobacterium coryneforme</i> | DSM 20216             | <i>Apis mellifera</i>           | 1.74     | 67       | JDUF00000000    |
| <i>Bifidobacterium indicum</i>     | ESL0197               | <i>Apis mellifera</i>           | 1.72     | 6        | NZ_QGLI00000000 |
| <i>Bifidobacterium indicum</i>     | LMG 11587 / DSM 20214 | <i>Apis mellifera</i>           | 1.73     | Complete | CP006018        |
| <i>Bifidobacterium asteroides</i>  | 7101                  | <i>Apis mellifera</i>           | 2.12     | 19       | AWUN00000000    |
| <i>Bifidobacterium asteroides</i>  | A11                   | <i>Apis mellifera</i>           | 2.18     | 51       | AWUO00000000    |
| <i>Bifidobacterium asteroides</i>  | wkB344                | <i>Apis mellifera</i>           | 2.12     | 27       | NPOQ00000000    |
| <i>Gilliamella apicola</i>         | A-12-12               | <i>Apis mellifera</i>           | 2.94     | 102      | NARO00000000    |
| <i>Gilliamella apicola</i>         | A-1-24                | <i>Apis mellifera</i>           | 3.14     | 157      | MZNE00000000    |
| <i>Gilliamella apicola</i>         | A-2-24                | <i>Apis mellifera</i>           | 3.14     | 129      | MZNF00000000    |
| <i>Gilliamella</i> sp. A-4-12      | A-4-12                | <i>Apis mellifera</i>           | 2.63     | 104      | NASK00000000    |
| <i>Gilliamella apicola</i>         | A-7-12                | <i>Apis mellifera</i>           | 3.14     | 91       | NARP00000000    |
| <i>Gilliamella apicola</i>         | A-7-24                | <i>Apis mellifera</i>           | 2.94     | 107      | NARQ00000000    |
| <i>Gilliamella apicola</i>         | A8                    | <i>Apis mellifera</i>           | 3.05     | 226      | MZNG00000000    |
| <i>Gilliamella apicola</i>         | A9                    | <i>Apis mellifera</i>           | 3.03     | 362      | NARS00000000    |
| <i>Gilliamella apicola</i>         | A-8-12                | <i>Apis mellifera</i>           | 2.93     | 110      | NARR00000000    |
| <i>Gilliamella apicola</i>         | A-9-12                | <i>Apis mellifera</i>           | 3.15     | 189      | NART00000000    |
| <i>Gilliamella</i> sp. AM1         | AM1                   | <i>Apis mellifera</i>           | 2.44     | 120      | NASL00000000    |
| <i>Gilliamella apicola</i>         | AM4                   | <i>Apis mellifera</i>           | 3.06     | 166      | NARY00000000    |
| <i>Gilliamella apicola</i>         | AM6                   | <i>Apis mellifera</i>           | 3        | 655      | MZNH00000000    |

| Species                       | Strain  | Host                  | Size Mbp | Contig | Accession       |
|-------------------------------|---------|-----------------------|----------|--------|-----------------|
| <i>Gilliamella</i> sp. A-TSA1 | A-TSA1  | <i>Apis mellifera</i> | 2.47     | 79     | NASO00000000    |
| <i>Gilliamella</i> sp. A-TSA2 | A-TSA2  | <i>Apis mellifera</i> | 2.46     | 72     | NASP00000000    |
| <i>Gilliamella</i> sp. A-TSA3 | A-TSA3  | <i>Apis mellifera</i> | 2.47     | 77     | NASQ00000000    |
| <i>Gilliamella</i> sp. A-TSA4 | A-TSA4  | <i>Apis mellifera</i> | 2.46     | 86     | NASR00000000    |
| <i>Gilliamella apicola</i>    | AW11    | <i>Apis mellifera</i> | 2.94     | 328    | NARX00000000    |
| <i>Gilliamella apicola</i>    | AW13    | <i>Apis mellifera</i> | 3.13     | 371    | NARU00000000    |
| <i>Gilliamella apicola</i>    | Aw-17   | <i>Apis mellifera</i> | 2.93     | 130    | MZNI00000000    |
| <i>Gilliamella apicola</i>    | B02     | <i>Apis mellifera</i> | 1.81     | 544    | JAIM00000000    |
| <i>Gilliamella apis</i>       | ESL0169 | <i>Apis mellifera</i> | 2.43     | 13     | NZ_QGLN00000000 |
| <i>Gilliamella apis</i>       | ESL0172 | <i>Apis mellifera</i> | 2.69     | 17     | NZ_QGLO00000000 |
| <i>Gilliamella apicola</i>    | ESL0177 | <i>Apis mellifera</i> | 3.09     | 19     | NZ_QGLP00000000 |
| <i>Gilliamella apicola</i>    | ESL0178 | <i>Apis mellifera</i> | 2.89     | 18     | NZ_QGLQ00000000 |
| <i>Gilliamella apicola</i>    | ESL0182 | <i>Apis mellifera</i> | 3.54     | 31     | NZ_QGLR00000000 |
| <i>Gilliamella apicola</i>    | I20     | <i>Apis mellifera</i> | 2.21     | 389    | JAIN00000000    |
| <i>Gilliamella apicola</i>    | M1-2G   | <i>Apis mellifera</i> | 2.39     | 10     | LZGQ00000000    |
| <i>Gilliamella apicola</i>    | M6-3G   | <i>Apis mellifera</i> | 2.71     | 85     | MCIU00000000    |
| <i>Gilliamella apicola</i>    | N10     | <i>Apis mellifera</i> | 2.9      | 202    | NARV00000000    |
| <i>Gilliamella apicola</i>    | N-12-12 | <i>Apis mellifera</i> | 3.08     | 147    | NAHT00000000    |
| <i>Gilliamella apicola</i>    | N-15-12 | <i>Apis mellifera</i> | 3.05     | 264    | NAHX00000000    |
| <i>Gilliamella apicola</i>    | N2      | <i>Apis mellifera</i> | 2.91     | 88     | NARW00000000    |
| <i>Gilliamella apicola</i>    | N-22    | <i>Apis mellifera</i> | 2.97     | 92     | NASB00000000    |
| <i>Gilliamella apicola</i>    | N4      | <i>Apis mellifera</i> | 2.91     | 127    | NARN00000000    |
| <i>Gilliamella apicola</i>    | N6      | <i>Apis mellifera</i> | 2.91     | 82     | NARZ00000000    |
| <i>Gilliamella</i> sp. N-G1   | N-G1    | <i>Apis mellifera</i> | 2.48     | 65     | NASS00000000    |
| <i>Gilliamella</i> sp. N-G2   | N-G2    | <i>Apis mellifera</i> | 2.71     | 77     | NAST00000000    |
| <i>Gilliamella</i> sp. N-G3   | N-G3    | <i>Apis mellifera</i> | 2.48     | 83     | NASU00000000    |
| <i>Gilliamella</i> sp. N-G4   | N-G4    | <i>Apis mellifera</i> | 2.44     | 142    | NASV00000000    |
| <i>Gilliamella apicola</i>    | N-G5    | <i>Apis mellifera</i> | 3.06     | 99     | NASA00000000    |
| <i>Gilliamella</i> sp. NO1    | NO1     | <i>Apis mellifera</i> | 2.52     | 156    | NASI00000000    |
| <i>Gilliamella apicola</i>    | NO10    | <i>Apis mellifera</i> | 3.05     | 398    | NAHU00000000    |
| <i>Gilliamella</i> sp. NO12   | NO12    | <i>Apis mellifera</i> | 2.53     | 68     | NASH00000000    |
| <i>Gilliamella</i> sp. NO13   | NO13    | <i>Apis mellifera</i> | 2.53     | 60     | NASG00000000    |
| <i>Gilliamella</i> sp. NO14   | NO14    | <i>Apis mellifera</i> | 2.52     | 75     | NASF00000000    |
| <i>Gilliamella</i> sp. NO15   | NO15    | <i>Apis mellifera</i> | 2.52     | 50     | NASJ00000000    |
| <i>Gilliamella</i> sp. NO16   | NO16    | <i>Apis mellifera</i> | 2.53     | 57     | NASE00000000    |

| Species                               | Strain  | Host                  | Size Mbp | Contig   | Accession       |
|---------------------------------------|---------|-----------------------|----------|----------|-----------------|
| <i>Gilliamella</i> sp. NO3            | NO3     | <i>Apis mellifera</i> | 2.52     | 54       | NASD00000000    |
| <i>Gilliamella</i> sp. NO4            | NO4     | <i>Apis mellifera</i> | 2.52     | 214      | NASM00000000    |
| <i>Gilliamella apicola</i>            | NO5     | <i>Apis mellifera</i> | 3.06     | 143      | NAHV00000000    |
| <i>Gilliamella apicola</i>            | NO6     | <i>Apis mellifera</i> | 3.06     | 129      | NAHR00000000    |
| <i>Gilliamella apicola</i>            | NO8     | <i>Apis mellifera</i> | 3.04     | 529      | NAHS00000000    |
| <i>Gilliamella</i> sp. N-W3           | N-W3    | <i>Apis mellifera</i> | 2.67     | 90       | NASW00000000    |
| <i>Gilliamella apicola</i>            | P17     | <i>Apis mellifera</i> | 1.47     | 296      | JAIO00000000    |
| <i>Gilliamella apicola</i>            | P46G    | <i>Apis mellifera</i> | 7.42     | 2779     | MCIV00000000    |
| <i>Gilliamella apicola</i>            | P54G    | <i>Apis mellifera</i> | 3.11     | 55       | LZGJ00000000    |
| <i>Gilliamella apicola</i>            | P62G    | <i>Apis mellifera</i> | 2.55     | 20       | LZGI00000000    |
| <i>Gilliamella apicola</i>            | P83G    | <i>Apis mellifera</i> | 2.49     | 28       | LZGH00000000    |
| <i>Gilliamella apicola</i>            | wkB1    | <i>Apis mellifera</i> | 3.14     | Complete | CP007445        |
| <i>Gilliamella apicola</i>            | wkB7    | <i>Apis mellifera</i> | 2.9      | Complete | LZGG01000000    |
| <i>Lactobacillus apinorum</i>         | Fhon13  | <i>Apis mellifera</i> | 1.46     | 33       | JXCT00000000    |
| <i>Lactobacillus</i> sp.              | ESL0263 | <i>Apis mellifera</i> | 1.82     | 12       | NZ_REHL00000000 |
| <i>Lactobacillus apis</i>             | R-53131 | <i>Apis mellifera</i> | 1.68     | 19       | FMAN00000000    |
| <i>Lactobacillus</i> sp.              | wkB10   | <i>Apis mellifera</i> | 2.08     | 32       | JRJB00000000    |
| <i>Lactobacillus kimbladii</i>        | Hma2    | <i>Apis mellifera</i> | 2.19     | 40       | JXLH00000000    |
| <i>Lactobacillus kullabergensis</i>   | Biut2   | <i>Apis mellifera</i> | 2.12     | 37       | JXBY00000000    |
| <i>Lactobacillus</i> sp.              | ESL0261 | <i>Apis mellifera</i> | 2.11     | 17       | NZ_REHN00000000 |
| <i>Lactobacillus melliventris</i>     | ESL0184 | <i>Apis mellifera</i> | 2.04     | 4        | NZ_QGLG00000000 |
| <i>Lactobacillus melliventris</i>     | Hma8    | <i>Apis mellifera</i> | 2.12     | 23       | JXLI00000000    |
| <i>Lactobacillus</i> sp.              | ESL0260 | <i>Apis mellifera</i> | 1.93     | 22       | NZ_REHO00000000 |
| <i>Lactobacillus helsingborgensis</i> | Bma5    | <i>Apis mellifera</i> | 2.02     | 28       | JXJR00000000    |
| <i>Lactobacillus</i> sp.              | wkB8    | <i>Apis mellifera</i> | 1.93     | Complete | CP009531        |
| <i>Lactobacillus</i> sp.              | ESL0262 | <i>Apis mellifera</i> | 1.87     | 15       | NZ_REHM00000000 |
| <i>Snodgrassella alvi</i>             | A12     | <i>Apis mellifera</i> | 2.4      | 214      | NAGX00000000    |
| <i>Snodgrassella alvi</i>             | A5      | <i>Apis mellifera</i> | 2.43     | 120      | NAHF01000000    |
| <i>Snodgrassella alvi</i>             | A-9-24  | <i>Apis mellifera</i> | 2.5      | 62       | NAHH01000000    |
| <i>Snodgrassella alvi</i>             | ESL0196 | <i>Apis mellifera</i> | 2.45     | 15       | NZ_QGLS00000000 |
| <i>Snodgrassella alvi</i>             | N-S2    | <i>Apis mellifera</i> | 2.42     | 73       | NAHM01000000    |
| <i>Snodgrassella alvi</i>             | N-S4    | <i>Apis mellifera</i> | 2.42     | 38       | NAHO00000000    |
| <i>Snodgrassella alvi</i>             | N-W7    | <i>Apis mellifera</i> | 2.42     | 62       | NAHJ01000000    |
| <i>Snodgrassella alvi</i>             | wkB332  | <i>Apis mellifera</i> | 2.49     | 30       | MEIJ00000000    |
| <i>Snodgrassella alvi</i>             | wkB339  | <i>Apis mellifera</i> | 2.5      | 27       | MEII00000000    |

| Species                       | Strain | Host                  | Size Mbp | Contig | Accession    |
|-------------------------------|--------|-----------------------|----------|--------|--------------|
| <i>Lactobacillus mellifer</i> | Bin4   | <i>Apis mellifera</i> | 1.82     | 28     | JXJQ00000000 |
| <i>Lactobacillus mellis</i>   | Hon2   | <i>Apis mellifera</i> | 1.81     | 17     | JXBZ00000000 |
