# Supplementary material for: Community Dynamics in Structure and Function of Honey Bee Gut Bacteria in Response to Winter Dietary Shift
Source: mBio. 2022 Aug 29;13(5):e01131-22. doi: 10.1128/mbio.01131-22 (PMC9600256; doi:10.1128/mbio.01131-22)
Supplement: TABLE S3 [file mbio.01131-22-s0003.pdf]

| EC                                 | Phenylalanine tyrosine and tryptophan biosynthesis |              |              |              |             |             |              |              |             |                       |                        |                        | Phenylalanine and tyrosine biosynthesis |             |             |             |              |                        |              |              |              |              | Tryptophan biosynthesis |              |              |              |              |              |                        |                        |              |                        | General L-amino acid transport system substrate-binding protein |        |        |        |  |
|------------------------------------|----------------------------------------------------|--------------|--------------|--------------|-------------|-------------|--------------|--------------|-------------|-----------------------|------------------------|------------------------|-----------------------------------------|-------------|-------------|-------------|--------------|------------------------|--------------|--------------|--------------|--------------|-------------------------|--------------|--------------|--------------|--------------|--------------|------------------------|------------------------|--------------|------------------------|-----------------------------------------------------------------|--------|--------|--------|--|
|                                    | EC: 1.1.1.25                                       | EC: 2.5.1.19 | EC: 2.7.1.71 | EC: 2.5.1.54 | EC: 4.2.3.4 | EC: 4.2.3.5 | EC: 4.2.1.10 | EC: 4.2.1.10 | EC: 1.1.5.8 | EC: 2.7.1.71; 4.2.3.4 | EC: 5.4.99.5; 4.2.1.51 | EC: 5.4.99.5; 1.3.1.12 | EC: 1.3.1.43; 1.3.1.12                  | EC: 2.6.1.1 | EC: 2.6.1.1 | EC: 2.6.1.9 | EC: 2.6.1.57 | EC: 4.2.1.51; 4.2.1.91 | EC: 5.4.99.5 | EC: 1.3.1.12 | EC: 4.2.1.51 | EC: 2.4.2.18 | EC: 4.1.1.48            | EC: 4.1.3.27 | EC: 4.1.3.27 | EC: 4.2.1.20 | EC: 4.2.1.20 | EC: 5.3.1.24 | EC: 4.1.3.27; 2.4.2.18 | EC: 4.1.1.48; 5.3.1.24 | EC: 4.1.3.27 | EC: 5.3.1.16; 5.3.1.24 |                                                                 |        |        |        |  |
| KO                                 | K00014                                             | K00800       | K00891       | K01626       | K01735      | K01736      | K03785       | K03786       | K03558      | K13829                | K14170                 | K14187                 | K00220                                  | K00812      | K00813      | K00817      | K00832       | K01713                 | K04092       | K04517       | K04518       | K00766       | K01609                  | K01657       | K01658       | K01695       | K01696       | K01817       | K13497                 | K13498                 | K13503       | K24017                 | K09969                                                          | K09970 | K09971 | K09972 |  |
| <i>Bifidobacterium</i> sp 7101     | 1                                                  | 1            | 1            | 2            | 1           | 1           | 1            | 0            | 1           | 0                     | 1                      | 0                      | 0                                       | 0           | 1           | 0           | 2            | 0                      | 0            | 1            | 1            | 0            | 1                       | 1            | 0            | 0            | 1            | 1            | 0                      | 0                      | 0            | 0                      | 0                                                               | 0      | 0      | 0      |  |
| <i>Gilliamella apicola</i> A-1-24  | 4                                                  | 1            | 3            | 1            | 1           | 1           | 2            | 0            | 0           | 0                     | 1                      | 1                      | 0                                       | 0           | 1           | 1           | 1            | 1                      | 0            | 0            | 1            | 1            | 1                       | 1            | 1            | 1            | 1            | 1            | 0                      | 1                      | 1            | 0                      | 0                                                               | 0      | 0      | 0      |  |
| <i>Gilliamella apicola</i> A-12-12 | 3                                                  | 1            | 2            | 1            | 1           | 1           | 1            | 0            | 0           | 0                     | 0                      | 1                      | 0                                       | 0           | 1           | 1           | 1            | 1                      | 0            | 0            | 1            | 1            | 1                       | 1            | 1            | 1            | 1            | 1            | 0                      | 1                      | 1            | 0                      | 0                                                               | 0      | 0      | 0      |  |
| <i>Gilliamella apicola</i> A-2-24  | 4                                                  | 1            | 3            | 1            | 1           | 1           | 2            | 0            | 0           | 0                     | 0                      | 1                      | 0                                       | 0           | 1           | 1           | 1            | 1                      | 0            | 0            | 1            | 1            | 1                       | 1            | 1            | 1            | 1            | 1            | 0                      | 1                      | 1            | 0                      | 0                                                               | 0      | 0      | 0      |  |
| <i>Gilliamella apicola</i> A-4-12  | 3                                                  | 1            | 2            | 1            | 1           | 1           | 1            | 0            | 0           | 0                     | 0                      | 1                      | 0                                       | 0           | 1           | 1           | 1            | 1                      | 0            | 0            | 1            | 1            | 1                       | 1            | 0            | 1            | 1            | 1            | 0                      | 1                      | 1            | 0                      | 0                                                               | 0      | 0      | 0      |  |
| <i>Gilliamella apicola</i> A-7-12  | 4                                                  | 1            | 3            | 1            | 1           | 1           | 2            | 0            | 0           | 0                     | 0                      | 1                      | 0                                       | 0           | 1           | 1           | 1            | 1                      | 0            | 0            | 1            | 1            | 1                       | 1            | 1            | 1            | 1            | 1            | 0                      | 1                      | 1            | 0                      | 0                                                               | 0      | 0      | 0      |  |
| <i>Gilliamella apicola</i> A-7-24  | 3                                                  | 1            | 2            | 1            | 1           | 1           | 1            | 0            | 0           | 0                     | 0                      | 1                      | 0                                       | 0           | 1           | 1           | 1            | 1                      | 0            | 0            | 1            | 1            | 1                       | 1            | 1            | 1            | 1            | 1            | 0                      | 1                      | 1            | 0                      | 0                                                               | 0      | 0      | 0      |  |
| <i>Gilliamella apicola</i> A-8-12  | 3                                                  | 1            | 2            | 1            | 1           | 1           | 1            | 0            | 0           | 0                     | 0                      | 1                      | 0                                       | 0           | 1           | 1           | 1            | 1                      | 0            | 0            | 1            | 1            | 1                       | 1            | 1            | 1            | 1            | 1            | 0                      | 1                      | 1            | 0                      | 0                                                               | 0      | 0      | 0      |  |
| <i>Gilliamella apicola</i> A-9-12  | 4                                                  | 1            | 3            | 1            | 1           | 1           | 2            | 0            | 0           | 0                     | 0                      | 1                      | 0                                       | 0           | 0           | 1           | 1            | 1                      | 0            | 0            | 1            | 1            | 1                       | 1            | 1            | 1            | 1            | 1            | 0                      | 1                      | 1            | 0                      | 0                                                               | 0      | 0      | 0      |  |
| <i>Snodgrassella alvi</i> A-9-24   | 1                                                  | 1            | 1            | 1            | 1           | 1           | 0            | 1            | 1           | 0                     | 1                      | 0                      | 0                                       | 0           | 0           | 0           | 1            | 1                      | 0            | 0            | 1            | 1            | 1                       | 1            | 1            | 1            | 1            | 1            | 1                      | 0                      | 0            | 0                      | 0                                                               | 0      | 0      | 0      |  |
| <i>Gilliamella apicola</i> A-TSA1  | 3                                                  | 1            | 2            | 1            | 1           | 1           | 1            | 0            | 0           | 0                     | 0                      | 1                      | 0                                       | 0           | 0           | 1           | 1            | 1                      | 0            | 0            | 0            | 1            | 1                       | 0            | 1            | 1            | 1            | 1            | 0                      | 1                      | 1            | 0                      | 0                                                               | 0      | 0      | 0      |  |
| <i>Gilliamella apicola</i> A-TSA2  | 3                                                  | 1            | 2            | 1            | 1           | 1           | 1            | 0            | 0           | 0                     | 0                      | 1                      | 0                                       | 0           | 1           | 1           | 1            | 1                      | 0            | 0            | 0            | 1            | 1                       | 0            | 1            | 1            | 1            | 1            | 0                      | 1                      | 1            | 0                      | 0                                                               | 0      | 0      | 0      |  |
| <i>Gilliamella apicola</i> A-TSA3  | 3                                                  | 1            | 2            | 1            | 1           | 1           | 1            | 0            | 0           | 0                     | 0                      | 1                      | 0                                       | 0           | 1           | 1           | 1            | 1                      | 0            | 0            | 0            | 1            | 1                       | 0            | 1            | 1            | 1            | 1            | 0                      | 1                      | 1            | 0                      | 0                                                               | 0      | 0      | 0      |  |
| <i>Gilliamella apicola</i> A-TSA4  | 3                                                  | 1            | 2            | 1            | 1           | 1           | 1            | 0            | 0           | 0                     | 0                      | 1                      | 0                                       | 0           | 0           | 1           | 1            | 1                      | 0            | 0            | 0            | 1            | 1                       | 0            | 1            | 1            | 1            | 1            | 0                      | 1                      | 1            | 0                      | 0                                                               | 0      | 0      | 0      |  |
| <i>Bifidobacterium</i> sp A11      | 1                                                  | 1            | 1            | 2            | 1           | 1           | 0            | 1            | 0           | 1                     | 0                      | 0                      | 0                                       | 0           | 1           | 0           | 2            | 0                      | 0            | 1            | 1            | 0            | 1                       | 1            | 0            | 0            | 0            | 1            | 1                      | 0                      | 0            | 0                      | 0                                                               | 1      | 0      | 0      |  |
| <i>Snodgrassella alvi</i> A12      | 1                                                  | 1            | 1            | 1            | 1           | 1           | 0            | 1            | 1           | 0                     | 1                      | 0                      | 0                                       | 0           | 0           | 0           | 1            | 1                      | 0            | 0            | 1            | 1            | 1                       | 1            | 1            | 1            | 1            | 1            | 1                      | 0                      | 0            | 0                      | 0                                                               | 0      | 0      | 0      |  |
| <i>Snodgrassella alvi</i> A5       | 1                                                  | 1            | 1            | 1            | 1           | 1           | 0            | 1            | 1           | 0                     | 1                      | 0                      | 0                                       | 0           | 0           | 0           | 1            | 1                      | 0            | 0            | 1            | 1            | 1                       | 1            | 1            | 1            | 1            | 1            | 1                      | 0                      | 0            | 0                      | 0                                                               | 0      | 0      | 0      |  |
| <i>Gilliamella apicola</i> A8      | 4                                                  | 1            | 3            | 1            | 1           | 1           | 2            | 0            | 0           | 0                     | 0                      | 1                      | 0                                       | 0           | 1           | 1           | 1            | 1                      | 0            | 0            | 1            | 1            | 1                       | 1            | 1            | 1            | 1            | 1            | 0                      | 1                      | 1            | 0                      | 0                                                               | 0      | 0      | 0      |  |
| <i>Gilliamella apicola</i> A9      | 4                                                  | 1            | 3            | 1            | 1           | 1           | 2            | 0            | 0           | 0                     | 0                      | 1                      | 0                                       | 0           | 0           | 1           | 1            | 1                      | 0            | 0            | 1            | 1            | 1                       | 1            | 1            | 1            | 1            | 1            | 0                      | 1                      | 1            | 0                      | 0                                                               | 0      | 0      | 0      |  |
| <i>Gilliamella apicola</i> AM1     | 3                                                  | 1            | 2            | 1            | 1           | 1           | 1            | 0            | 0           | 0                     | 0                      | 1                      | 0                                       | 0           | 0           | 1           | 1            | 1                      | 0            | 0            | 0            | 1            | 1                       | 0            | 1            | 1            | 1            | 1            | 0                      | 1                      | 1            | 0                      | 0                                                               | 0      | 0      | 0      |  |
| <i>Gilliamella apicola</i> AM4     | 4                                                  | 1            | 3            | 1            | 1           | 1           | 2            | 0            | 0           | 0                     | 0                      | 1                      | 0                                       | 0           | 0           | 1           | 1            | 1                      | 0            | 0            | 1            | 1            | 1                       | 1            | 1            | 1            | 1            | 1            | 1                      | 1                      | 0            | 0                      | 0                                                               | 0      | 0      | 0      |  |
| <i>Gilliamella apicola</i> AM6     | 4                                                  | 1            | 3            | 1            | 1           | 1           | 2            | 0            | 0           | 0                     | 0                      | 1                      | 0                                       | 0           | 0           | 1           | 1            | 1                      | 0            | 0            | 1            | 1            | 1                       | 1            | 1            | 1            | 1            | 1            | 1                      | 1                      | 0            | 0                      | 0                                                               | 0      | 0      | 0      |  |
| <i>Gilliamella apicola</i> Aw-17   | 3                                                  | 1            | 2            | 1            | 1           | 1           | 1            | 0            | 0           | 0                     | 0                      | 1                      | 0                                       | 0           | 0           | 1           | 1            | 1                      | 0            | 0            | 1            | 1            | 1                       | 1            | 1            | 1            | 1            | 1            | 0                      | 1                      | 1            | 0                      | 0                                                               | 0      | 0      | 0      |  |
| <i>Gilliamella apicola</i> AW11    | 3                                                  | 1            | 2            | 1            | 1           | 1           | 1            | 0            | 0           | 0                     | 0                      | 1                      | 0                                       | 0           | 0           | 1           | 1            | 1                      | 0            | 0            | 1            | 1            | 1                       | 1            | 1            | 1            | 1            | 1            | 0                      | 1                      | 1            | 0                      | 0                                                               | 0      | 0      | 0      |  |
| <i>Gilliamella apicola</i> AW13    | 4                                                  | 1            | 3            | 1            | 1           | 1           | 2            | 0            |             |                       |                        |                        |                                         |             |             |             |              |                        |              |              |              |              |                         |              |              |              |              |              |                        |                        |              |                        |                                                                 |        |        |        |  |
